# Supplementary material for: Comparison of Au–Ce and Au–Cu interaction over Au/CeO2–CuO catalysts for preferential CO oxidation
Source: Royal Society of Chemistry journal article supplement (doi:10.1039/c8ce01839a), 2018-11-20
Supplement: c8ce01839a1.pdf [file c8ce01839a1.pdf]

## Supporting Information

### Comparison of Au-Ce and Au-Cu interaction over Au/CeO<sub>2</sub>-CuO catalysts for preferential CO oxidation

Guojuan Jing,<sup>&a</sup> Lu Zhang,<sup>&b</sup> Yurong Ma,<sup>a</sup> Jinfang Wu,<sup>\*a</sup> Qi wang,<sup>a</sup> Guoqing Wu,<sup>a</sup> Lihui Yan<sup>a</sup> and Shanghong Zeng<sup>\*a</sup>

<sup>a</sup> Inner Mongolia Key Laboratory of Chemistry and Physics of Rare Earth Materials, School of Chemistry and Chemical Engineering, Inner Mongolia University, Hohhot 010021, China

<sup>b</sup> School of Chemistry, Beijing Institute of Technology, Beijing 102488, P. R. of China

(& These authors contributed equally to this work and should be considered co-first authors)

(\* To whom correspondence should be addressed. Emails: jfwu@imu.edu.cn; zengshanghong@imu.edu.cn)

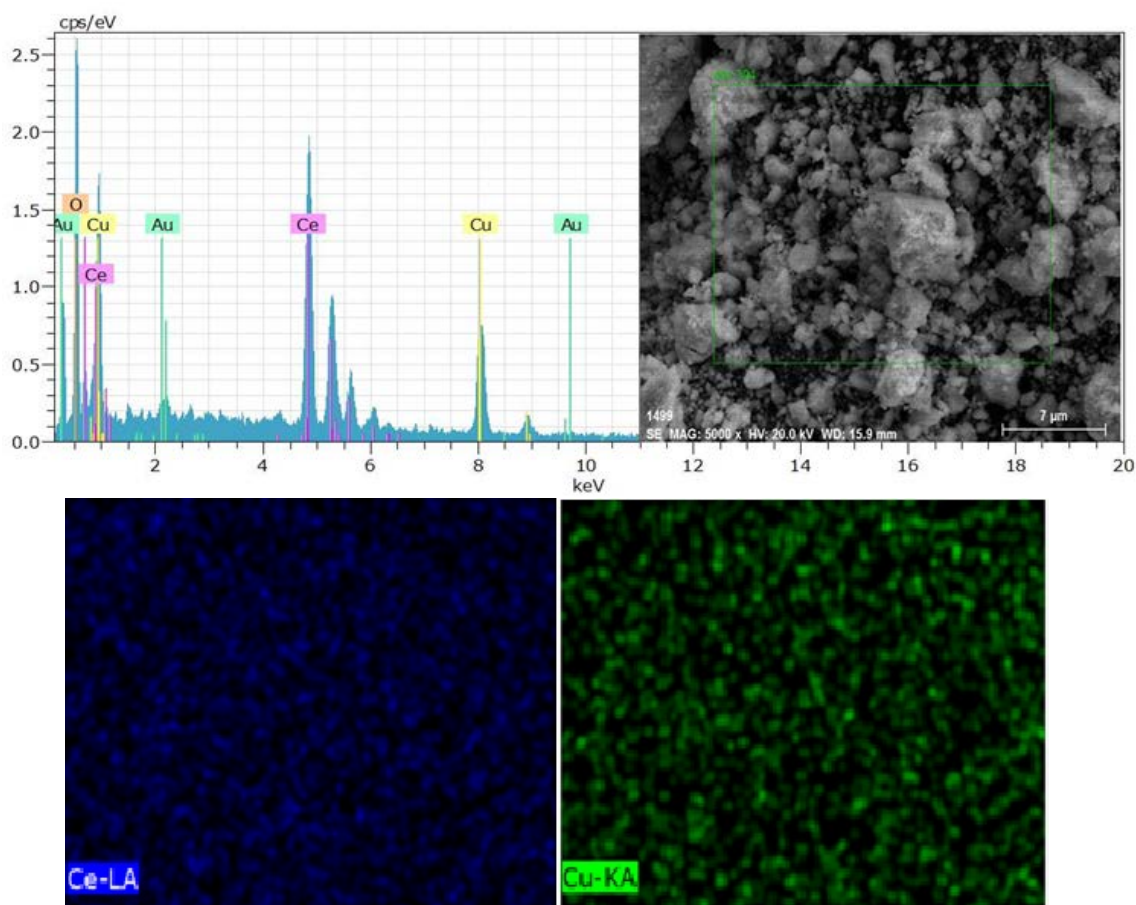

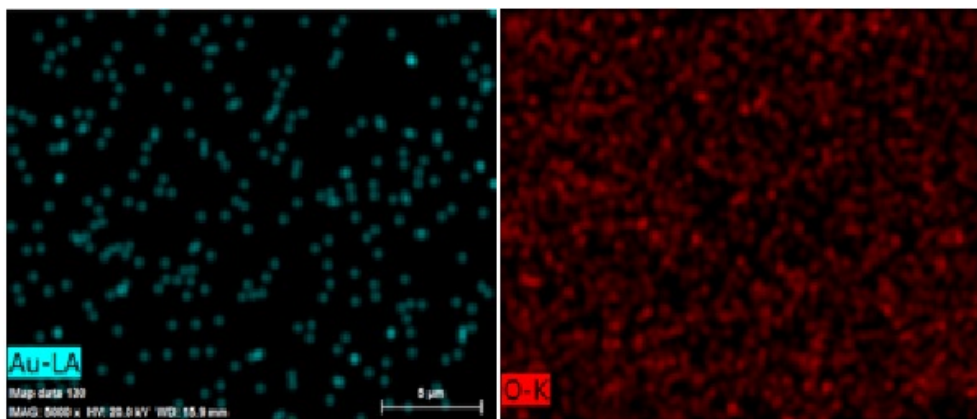

Fig. S1. SEM-EDS images of the  $\text{Au}_{0.04}/\text{CeO}_2\text{-CuO}$  catalyst.

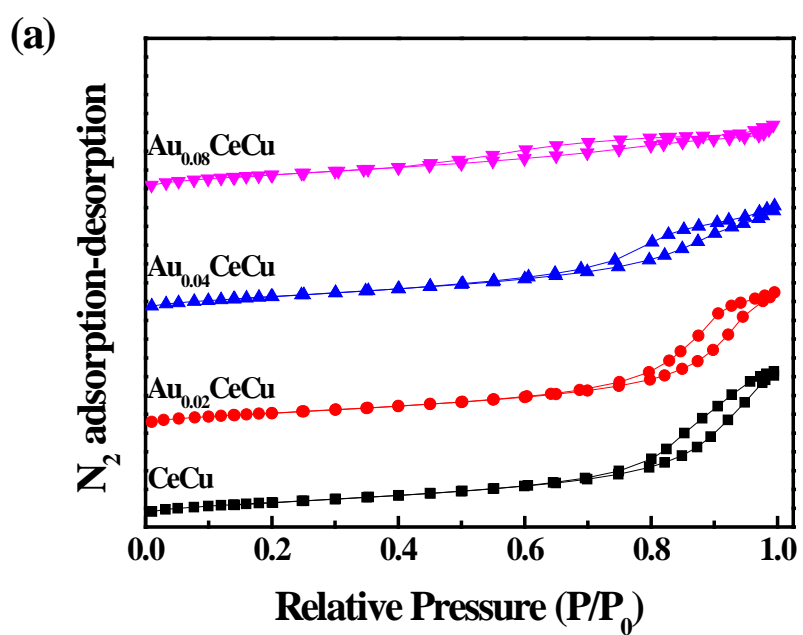

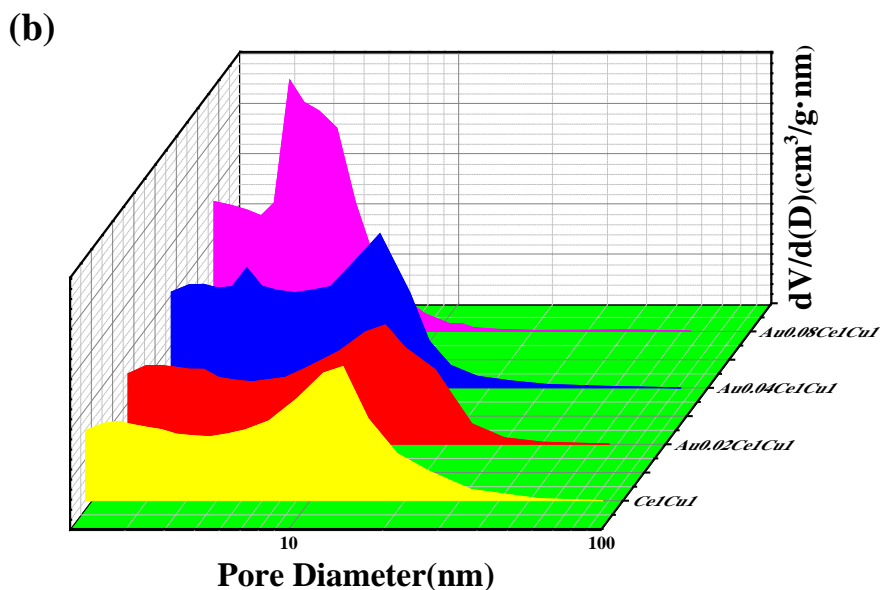

**Fig. S2.**  $N_2$  adsorption-desorption isotherms and pore size distribution curves of the  $CeO_2$ -CuO and Au/  $CeO_2$ -CuO catalysts.

The  $N_2$  adsorption-desorption isotherms correspond to type IV in the relative pressure ( $p/p_0$ ) range of 0.5–1.0 for the as-prepared catalysts, suggesting that the catalysts possess the mesoporous structure. Moreover, the pore size distribution curves indicate that the pore sizes of the catalysts decrease with increasing Au loading.

### XRD results for the repeated measurements:

We have redone the synthesis and measured XRD. The results are presented as follow.

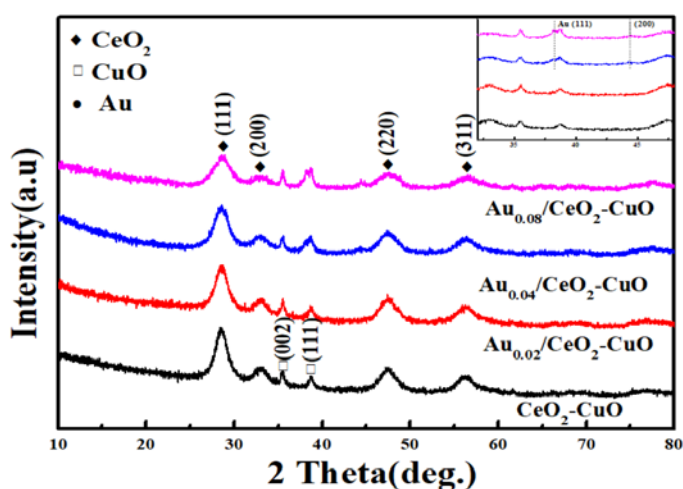

**Fig. S3** XRD patterns of the  $CeO_2$ -CuO and Au/ $CeO_2$ -CuO catalysts.

The crystallite sizes of CeO<sub>2</sub> are 5.0, 4.9, 4.7 and 4.4 nm, respectively. The Crystallite sizes of CuO are 16.9, 19.7, 21.6 and 22.4 nm, respectively. The results show that gold concentration indeed affects the sizes of CeO<sub>2</sub> and CuO. And the change in size is basically consistent with the trend described by XRD analysis.

**Table S1** Literature data for PROX reaction over the different catalysts

| Catalyst                                                           | Operating conditions                                               | GHSV<br>(mL h <sup>-1</sup> g <sup>-1</sup> <sub>cat</sub> ) | T <sub>50</sub><br>(°C) | T <sub>100</sub><br>(°C) | CO <sub>2</sub> selectivity<br>in T <sub>100</sub> (%) | Width |
|--------------------------------------------------------------------|--------------------------------------------------------------------|--------------------------------------------------------------|-------------------------|--------------------------|--------------------------------------------------------|-------|
| Au <sub>0.08</sub> /CeO <sub>2</sub> -CuO<br>this work             | 1% CO, 1% O <sub>2</sub> , 50%<br>H <sub>2</sub> in N <sub>2</sub> | 40000                                                        | 60                      | 95                       | 82                                                     | 60    |
| Au-CuO <sub>x</sub> /CeO <sub>2</sub> <sup>S1</sup>                | 2 % CO, 2 % O <sub>2</sub> ,<br>70 % H <sub>2</sub> , in He        | 60000                                                        | 55                      | 100                      | 50                                                     | 80    |
| Classical Cu <sub>x</sub> O/CeO <sub>2</sub> <sup>S1</sup>         | 2 % CO, 2 % O <sub>2</sub> ,<br>70 % H <sub>2</sub> , in He        | 60000                                                        | 80                      | 120                      | 48                                                     | 60    |
| Au <sub>3</sub> Cu <sub>1</sub> /CeO <sub>2</sub> -R <sup>S2</sup> | 1.0% CO, 1.0 % O <sub>2</sub> ,<br>50% H <sub>2</sub> in He        | 240000                                                       | 50                      | 125                      | 50                                                     | 50    |
| Au-Cu/SBA-15 <sup>S3</sup>                                         | 1% CO, 1% O <sub>2</sub> , in<br>He                                | 20000                                                        | 0                       | 25                       | --                                                     | --    |
| Au/CuO-CeO <sub>2</sub> <sup>S4</sup>                              | 1.33% CO, 1.33%<br>O <sub>2</sub> , 65.33% H <sub>2</sub> in He    | 30000                                                        | 28                      | 50                       | 63                                                     | 30    |

## References

- S1 J. d. S. L. Fonseca, H. S. Ferreira, N. Bion, L. Pirault-Roy, M. d. C. Rangel, D. Duprez and F. Epron, *Catal. Today*, 2012, 180, 34-41.
- S2 X. M. Liao, W. Chu, X. Y. Dai and V. Pitchon, *Appl. Catal. B: Environ.*, 2013, 142-143, 25-37.
- S3 X. Y. Liu , A. Q. Wang, L. Li, T. Zhang , C. Y. Mou and J. F. Lee, *J. Catal.*, 2011, 278, 288–296.
- S4 D. S. Lee and Y. W. Chen, *Int. J. Hydrogen Energy*, 2016, 41, 3605-3612.
